# Supplementary material for: Development and evaluation of a “simulator-based” ultrasound training program for university teaching in obstetrics and gynecology–the prospective GynSim study
Source: PubMed Central journal article supplement (PMC11076731; doi:10.3389/fmed.2024.1371141), 2024-04-24

A

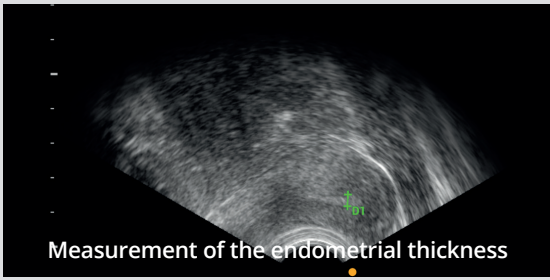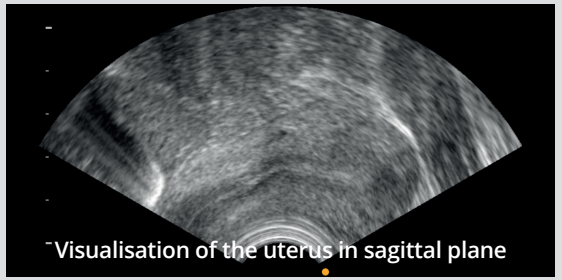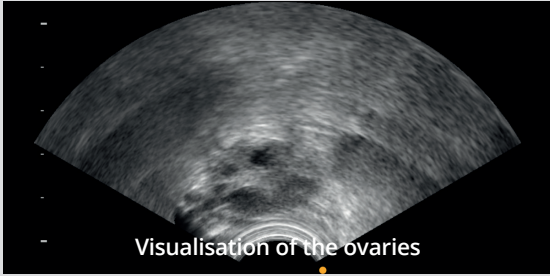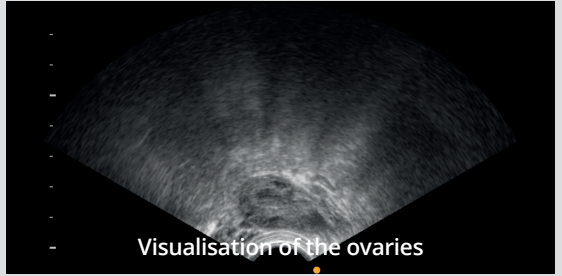

B

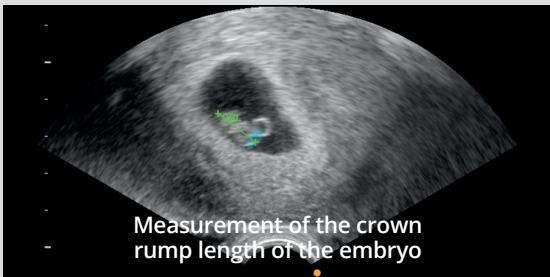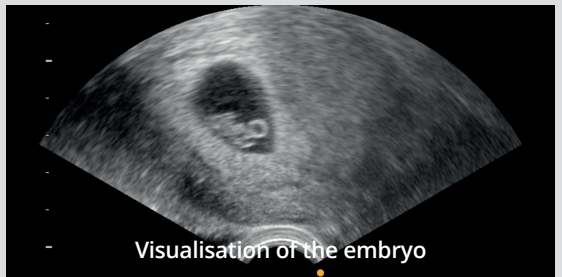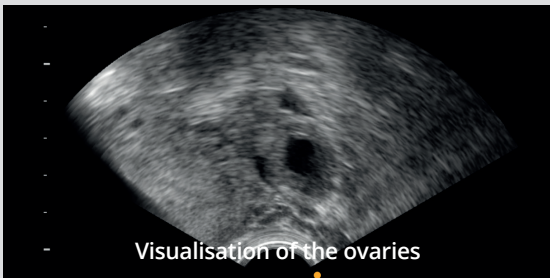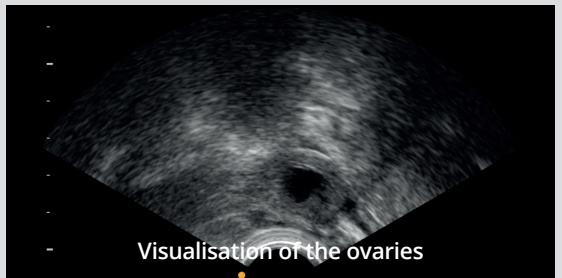

C

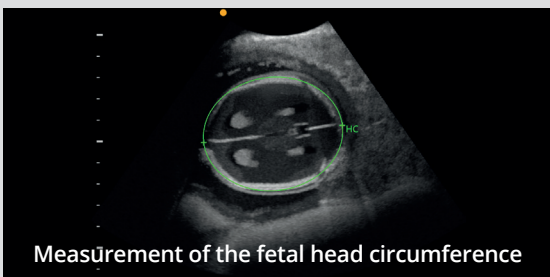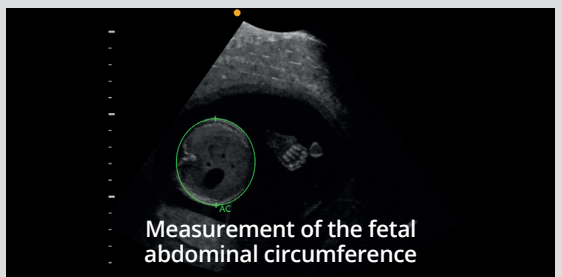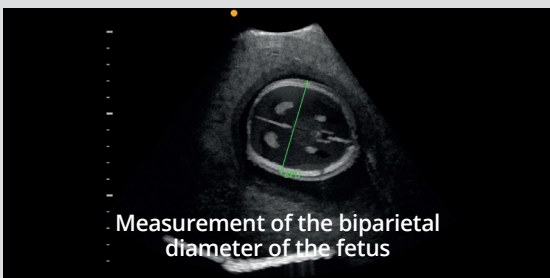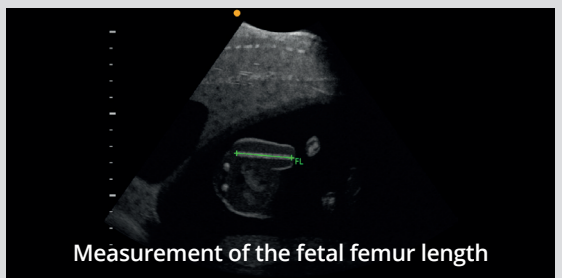

Supplement: Data_Sheet_4.pdf [file Data_Sheet_4.pdf]
