# Supplementary material for: Development and evaluation of a “simulator-based” ultrasound training program for university teaching in obstetrics and gynecology–the prospective GynSim study
Source: PubMed Central journal article supplement (PMC11076731; doi:10.3389/fmed.2024.1371141), 2024-04-24
Supplement: Data_Sheet_11.pdf [file Data_Sheet_11.pdf]

**S 11: Significant correlations of subjective and objective result;** R= correlation coefficient, ob/gyn: obstetric/ gynecologic, TAS: transabdominal ultrasound examinations, TVS transvaginal ultrasound examinations, T1: Evaluation<sup>pre</sup>, T2b: Evaluation<sup>post</sup>

|                         | <b>Factor 1 (y)</b>                                                | <b>Factor 2 (x)</b>                                             | <b>R</b> | <b>p-value</b> |
|-------------------------|--------------------------------------------------------------------|-----------------------------------------------------------------|----------|----------------|
| subjective – subjective | Comfort level in performing ob/gyn TAS independently (T1)          | Comfort level in performing ob/gyn TVS independently (T1)       | 0.55     | < 0.001        |
| subjective – subjective | Subjective level of skills competence in ob/gyn ultrasound(T1)     | Comfort level in performing ob/gyn TAS independently (T1)       | 0.39     | < 0.001        |
| subjective – subjective | Comfort level in performing ob/gyn TAS independently (T1)          | Subjective level of skills competence in ob/gyn ultrasound (T1) | 0.68     | < 0.001        |
| subjective – subjective | Comfort level in performing ob/gyn TVS independently (T1)          | Subjective level of skills competence in ob/gyn ultrasound (T1) | 0.46     | < 0.001        |
| subjective – subjective | Subjective level of skills competence in ob/gyn ultrasound (T2b)   | Subjective level of skills competence in ob/gyn ultrasound (T1) | 0.32     | 0.001          |
| subjective – subjective | Subjective level of skills competence in ob/gyn ultrasound (Delta) | Subjective level of skills competence in ob/gyn ultrasound (T1) | 0.64     | < 0.001        |
| subjective – subjective | Subjective level of skills competence in ob/gyn ultrasound (Delta) | Comfort level in performing ob/gyn TAS independently (T1)       | 0.41     | < 0.001        |
| subjective – subjective | Learning golas (T1)                                                | Interest for ob/gyn simulator ultrasound training (T1)          | 0.38     | < 0.001        |
| subjective – subjective | Advantages of simulator-based ultrasound Training-Total score (T1) | Interest for ob/gyn simulator ultrasound training (T1)          | 0.42     | < 0.001        |
| subjective – subjective | Subjective level of skills competence in ob/gyn ultrasound (T2b)   | Interest for ob/gyn simulator ultrasound training (T1)          | 0.31     | 0.001          |
| subjective – subjective | Interest for ob/gyn simulator ultrasound training (T2b)            | Interest for ob/gyn simulator ultrasound training (T1)          | 0.52     | < 0.001        |
| subjective – subjective | Advantages of simulator-based ultrasound Training-Total score (T1) | Learning golas (T1)                                             | 0.45     | < 0.001        |
| subjective – subjective | Learning golas (T2b)                                               | Learning golas (T1)                                             | 0.41     | < 0.001        |

|                         |                                                                       |                                                                    |      |         |
|-------------------------|-----------------------------------------------------------------------|--------------------------------------------------------------------|------|---------|
| subjective              |                                                                       |                                                                    |      |         |
| subjective – subjective | Subjective level of skills competence in ob/gyn ultrasound (T2b)      | Advantages of simulator-based ultrasound Training-Total score (T1) | 0.31 | 0.001   |
| subjective – subjective | Learning goals (T2b)                                                  | Advantages of simulator-based ultrasound Training-Total score (T1) | 0.33 | 0.001   |
| subjective – subjective | Advantages of simulator-based ultrasound Training-Total score (Delta) | Advantages of simulator-based ultrasound Training-Total score (T1) | 0.52 | < 0.001 |
| objective – objective   | Test Theory <sup>post</sup> -Total score (T2b)                        | Test Theory <sup>pre</sup> -Total score (T1)                       | 0.24 | 0.03    |
| objective – objective   | Total score Deviation                                                 | Test Theory <sup>pre</sup> -Total score (T1)                       | -0.4 | 0.01    |
| objective – objective   | Theory Test-Total score (Delta)                                       | Test Theory <sup>pre</sup> -Total score (T1)                       | 0.57 | < 0.001 |
| subjective – subjective | Comfort level in performing ob/gyn TAS independently (T2b)            | Subjective level of skills competence in ob/gyn ultrasound (T2b)   | 0.54 | < 0.001 |
| subjective – subjective | Comfort level in performing ob/gyn TVS independently (T2b)            | Subjective level of skills competence in ob/gyn ultrasound (T2b)   | 0.64 | < 0.001 |
| subjective – subjective | Interest for ob/gyn simulator ultrasound training (T2b)               | Subjective level of skills competence in ob/gyn ultrasound (T2b)   | 0.44 | < 0.001 |
| subjective – subjective | Learning goals (T2b)                                                  | Subjective level of skills competence in ob/gyn ultrasound (T2b)   | 0.45 | < 0.001 |
| subjective – subjective | Advantages of simulator-based ultrasound Training-Total score (T2b)   | Subjective level of skills competence in ob/gyn ultrasound (T2b)   | 0.47 | < 0.001 |
| subjective – subjective | Properties of the ultrasound simulator-Total score (T2b)              | Subjective level of skills competence in ob/gyn ultrasound (T2b)   | 0.45 | < 0.001 |
| subjective – subjective | Improvement in visuomotor skills (T2b)                                | Subjective level of skills competence in ob/gyn ultrasound (T2b)   | 0.49 | < 0.001 |
| subjective – subjective | Comfort level in performing ob/gyn TVS independently (Delta)          | Subjective level of skills competence in ob/gyn ultrasound (T2b)   | 0.34 | < 0.001 |
| subjective – subjective | Comfort level in performing ob/gyn TVS independently                  | Comfort level in performing ob/gyn TAS                             | 0.81 | < 0.001 |

|                         |                                                                     |                                                            |      |         |
|-------------------------|---------------------------------------------------------------------|------------------------------------------------------------|------|---------|
| subjective              | (T2b)                                                               | independently (T2b)                                        |      |         |
| subjective – subjective | Interest for ob/gyn simulator ultrasound training (T2b)             | Comfort level in performing ob/gyn TAS independently (T2b) | 0.38 | 0.003   |
| subjective – subjective | Learning goals (T2b)                                                | Comfort level in performing ob/gyn TAS independently (T2b) | 0.57 | < 0.001 |
| subjective – subjective | Advantages of simulator-based ultrasound Training-Total score (T2b) | Comfort level in performing ob/gyn TAS independently (T2b) | 0.54 | < 0.001 |
| subjective – subjective | Properties of the ultrasound simulator-Total score (T2b)            | Comfort level in performing ob/gyn TAS independently (T2b) | 0.47 | < 0.001 |
| subjective – subjective | Improvement in visuomotor skills (T2b)                              | Comfort level in performing ob/gyn TAS independently (T2b) | 0.58 | < 0.001 |
| objektiv – subjektiv    | Qualitative assessment Practical Test-Total score                   | Comfort level in performing ob/gyn TAS independently (T2b) | 0.30 | 0.01    |
| subjective – subjective | Comfort level in performing ob/gyn TAS independently (Delta)        | Comfort level in performing ob/gyn TAS independently (T2b) | 0.78 | < 0.001 |
| subjective – subjective | Comfort level in performing ob/gyn TVS independently (Delta)        | Comfort level in performing ob/gyn TAS independently (T2b) | 0.76 | < 0.001 |
| subjective – subjective | Interest for ob/gyn simulator ultrasound training (T2b)             | Comfort level in performing ob/gyn TVS independently (T2b) | 0.45 | < 0.001 |
| subjective – subjective | Learning goals (T2b)                                                | Comfort level in performing ob/gyn TVS independently (T2b) | 0.56 | < 0.001 |
| subjective – subjective | Advantages of simulator-based ultrasound Training-Total score (T2b) | Comfort level in performing ob/gyn TVS independently (T2b) | 0.48 | < 0.001 |
| subjective – subjective | Properties of the ultrasound simulator-Total score (T2b)            | Comfort level in performing ob/gyn TVS independently (T2b) | 0.54 | < 0.001 |
| subjective – subjective | Improvement in visuomotor skills (T2b)                              | Comfort level in performing ob/gyn TVS independently (T2b) | 0.6  | < 0.001 |
| subjective – subjective | Comfort level in performing ob/gyn TAS independently (Delta)        | Comfort level in performing ob/gyn TVS independently (T2b) | 0.51 | < 0.001 |
| subjective – subjective | Comfort level in performing ob/gyn TVS independently                | Comfort level in performing ob/gyn TVS                     | 0.76 | < 0.001 |

|                         |                                                               |                                                                     |      |         |
|-------------------------|---------------------------------------------------------------|---------------------------------------------------------------------|------|---------|
| subjective              | (Delta)                                                       | independently (T2b)                                                 |      |         |
| subjective – subjective | Learning goals (T2b)                                          | Interest for ob/gyn simulator ultrasound training (T2b)             | 0.41 | < 0.001 |
| subjective – subjective | Improvement in visuomotor skills (T2b)                        | Interest for ob/gyn simulator ultrasound training (T2b)             | 0.32 | 0.003   |
| objective – subjective  | Theory Test-Total score (T2b)                                 | Interest for ob/gyn simulator ultrasound training (T2b)             | 0.32 | 0.002   |
| objective – subjective  | Qualitative assessment Practical Test-Total score             | Interest for ob/gyn simulator ultrasound training (T2b)             | 0.30 | 0.01    |
| subjective – subjective | Advantages of simulator-based ultrasound training (post)      | Learning goals (T2b)                                                | 0.66 | < 0.001 |
| subjective – subjective | Properties of the ultrasound simulator-Total score (T2b)      | Learning goals (T2b)                                                | 0.51 | < 0.001 |
| subjective – subjective | Improvement in visuomotor skills (T2b)                        | Learning goals (T2b)                                                | 0.48 | < 0.001 |
| subjective – subjective | Comfort level in performing ob/gyn TVS independently (Delta)  | Learning goals (T2b)                                                | 0.5  | < 0.001 |
| subjective – subjective | Properties of the ultrasound simulator-Total score (T2b)      | Advantages of simulator-based ultrasound Training-Total score (T2b) | 0.51 | < 0.001 |
| subjektiv – subjektiv   | Improvement in visuomotor skills (T2b)                        | Advantages of simulator-based ultrasound Training-Total score (T2b) | 0.41 | < 0.001 |
| subjective – subjective | Improvement of visuomotor skills (post)                       | Properties of the ultrasound simulator-Total score (T2b)            | 0.47 | < 0.001 |
| objective – subjective  | Theory Test-Total score (T2b)                                 | Properties of the ultrasound simulator-Total score (T2b)            | 0.30 | 0.01    |
| subjective – subjective | Comfort level in performing ob/gyn TVS in-dependently (Delta) | Properties of the ultrasound simulator-Total score (T2b)            | 0.43 | < 0.001 |
| subjective – subjective | Comfort level in performing ob/gyn TAS independently (Delta)  | Improvement in visuomotor skills (T2b)                              | 0.41 | < 0.001 |

|                         |                                                                       |                                                              |           |         |
|-------------------------|-----------------------------------------------------------------------|--------------------------------------------------------------|-----------|---------|
| subjective – subjective | Comfort level in performing ob/gyn TVS in-dependently (Delta)         | Improvement in visuomotor skills (T2b)                       | 0.48      | < 0.001 |
| objective – objective   | Qualitative assessment Practical Test-Total score                     | Practical test-Total score                                   | 0.64      | < 0.001 |
| objective – objective   | Correct interpretation of findings-Total score                        | Practical test-total score                                   | 0.95      | < 0.001 |
| objective – objective   | Total interpretation                                                  | Qualitative assessment Practical Test-Total score            | 0.37      | < 0.001 |
| objective – objective   | Total score deviation                                                 | Qualitative assessment Practical Test-Total score            | -<br>0.34 | 0.02    |
| subjective – subjective | Comfort level in performing ob/gyn TVS independently (Delta)          | Comfort level in performing ob/gyn TVS independently (Delta) | 0.71      | < 0.001 |
| subjective – subjective | Advantages of simulator-based ultrasound Training-Total score (Delta) | Learning goals (Delta)                                       | 0.45      | < 0.001 |
